# Supplementary material
Source: publisher site journal article supplement (https://www.dovepress.com/article/supplementary_file/624003/624003_Supplementary%20Appendix.docx)
Supplement: Supplementary file 1 [file 624003_Supplementary%20Appendix.docx]

**Supplementary Appendix 1. Survey**

This survey is part of a study being carried out by a research team from the Faculty of Pharmacy at the University of Jordan to determine the Prevalence, Knowledge and Awareness level of Atopic Dermatitis among adults living in Jordan.

Please note that this study is anonymous. Your involvement is voluntary, and you have the right to drop out of the study at any time. It should take about 10 minutes to complete the questionnaire. If you have any questions or concerns, you can contact us at the email: [mais.saleh@ju.edu.jo](mailto:mais.saleh@ju.edu.jo) .

Thank you for your participation.

**Part 1: Consent form**

1. Email: …………………..

2. I have read and understood the information mentioned above, and it gave me the opportunity to ask questions and receive clear answers. Additionally, I voluntarily agree to participate in this research.

- Yes
- No

**Part 2: Demographic characteristics**

1. gender:

- Male
- Female

2. Age:

- 18-20
- 21-30
- 31-40
- 41-50
- 51-60
- More than 60

3.Nationality:

- Jordanian
- Non-Jordanian

4. Location:

- Middle (Amman, Zarqa, Balqaa’,Madaba)
- North) Irbid, Ajloun, Jarash, Mafraq)
- South (Karak, Tafila, Maan, Aqaba)

5. What is your educational level?

- Illiterate
- Elementary school
- middle School
- High school
- Diploma degree
- Bachelor's degree
- Postgraduate Studies (Masters, PhD)

6. Occupation:

- Free business
- Retired
- employee
- student
- Unemployed

7. What is the monthly income of you or your family?

- less than 500 jd
- 500-1000 jd
- More than 1000 jd

8. Marital status:

- Single
- Married
- Widowed
- Divorced

9. Parental history of atopic dermatitis?

- Yes
- No

**Part 3: Knowledge and Awareness about atopic dermatitis**

1. Have you Heard of a skin disease called Atopic Dermatitis?

- Yes
- No

1. Is Atopic Dermatitis contagious?

- Yes
- No
- I don’t Know

1. What is the role of therapy in Atopic Dermatitis?

- Control the disease
- Cure the disease
- I don’t know exactly

1. What is the importance of constant daily moisturization in the treatment of Atopic Dermatitis?

- Not important
- Somewhat important
- Very important
- I don’t know exactly

1. Can the offspring of a patient with Atopic Dermatitis inherit the disease from their parent?

- Yes
- No
- I don’t Know

1. Can a person with Atopic Dermatitis develop asthma?

- Yes
- No
- I don’t Know

1. Can a person with Atopic Dermatitis develop allergic rhinitis?

- Yes
- No
- I don’t Know

1. Can perfumes and scented soaps worsen Atopic Dermatitis?

- Yes
- No
- I don’t Know

1. Will every child with eczema suffer all their life from Atopic Dermatitis?

- Yes
- No
- I don’t Know
- Not every case

1. Do you agree or disagree that certain foods always make Atopic Dermatitis worse in every?

patient?

- Yes, I agree food always causes flare ups
- Not in every case
- I don’t know

1. Do you think atopic dermatitis will affect school achievement and performance?

- Yes
- No
- I don’t Know

1. Do you think a person with Atopic Dermatitis will have problems making friends?

- Yes
- No
- I don’t Know

1. Do you think atopic dermatitis can affect diet behavior?

- Yes
- No
- I don’t Know

1. Do you think atopic dermatitis can affect children's vaccination schedule?

- Yes
- No
- I don’t Know

**Part 4: Atopic Dermatitis Prevalence**

1. Have you ever been diagnosed with atopic dermatitis by a physician?

- Yes
- No

1. What is the specialty of that doctor?

- Pharmacist
- Family doctor
- pediatrician
- Dermatologist
- Allergist and immunologist
- General Doctor
- I have never visited a doctor for my skin condition
- I don’t have any skin condition

Are you experiencing any skin symptoms?

o Yes

o No

(If yes, go to section 5. If no, go to section 6: Finish and submit the form)

**Part 5: In case of skin symptoms**

1. Do you have any of the following symptoms on your skin?

- itching
- erythema
- Oozing and crusting
- dry, cracked skin.
- Small, raised bumps.
- I don’t have any skin condition

1. Where is the most common site of lesions?

- Knee
- Chest or back
- Neck
- Ankle
- Elbow
- Face
- I don’t have any skin condition

1. How do you classify your skin condition severity?

- Clear (no sign of inflammatory atopic dermatitis)
- Almost clear (hardly perceptible erythema and infiltration/papulation) Mild erythema and infiltration/papulation
- Moderate erythema and infiltration/papulation
- Severe erythema and infiltration/papulation
- Severe erythema and infiltration/papulation with oozing/crusting.
- I don’t have any skin condition

1. How many times do symptoms occur in a week?

- More than one night/ week
- Once per month
- One night/ week
- Rarely
- I don’t have any skin condition

1. Do you think that atopic dermatitis affects your daily activities or work performance?

- Yes
- No
- I don’t have any skin condition

1. Do you think that atopic dermatitis affects your close relationships?

- Yes
- No
- I don’t have any skin condition

1. Does the severity of itching affect your sleeping at night?

- Yes
- No
- I don’t have any skin condition

1. What medication are you using?
   - Topical corticosteroids
   - Topical immunosuppressants
   - Chronic corticosteroids
   - Oral antihistamines
   - Chronic immunosuppressants
   - Moisturizer
   - Other medication (list below the question)
   - I don't use any medication
   - I use two or more medications

**Section 6: Last section of the Survey**

Do you wish to submit your answers?

- Yes, I agree to submit my answers to participate in this research.

ترجمة الأسئلة المتعلقة ب " ﻣﻌدل اﻻﻧﺗﺷﺎر وﻣﺳﺗوى اﻟﻣﻌرﻓﺔ واﻟوﻋﻲ ﺣول اﻟﺗﮭﺎب اﻟﺟﻠد اﻟﺗﺄﺗﺑﻲ ﺑﯾن اﻟﺑﺎﻟﻐﯾن ﻓﻲ اﻷردن" من اللغة الإنجليزية إلى العربية

ﯾُﺟرى ھذا اﻻﺳﺗﺑﯾﺎن ﺿﻣن إطﺎر دراﺳﺔ ﺑﺣﺛﯾﺔ ﯾﺷرف ﻋﻠﯾﮭﺎ ﻓرﯾﻖ ﻣن ﻛﻠﯾﺔ اﻟﺻﯾدﻟﺔ ﻓﻲ اﻟﺟﺎﻣﻌﺔ اﻷردﻧﯾﺔ، وﺗﮭدف إﻟﻰ ﻗﯾﺎس ﻣدى

اﻧﺗﺷﺎر ﻣرض اﻟﺗﮭﺎب اﻟﺟﻠد اﻟﺗﺄﺗﺑﻲ ﺑﯾن اﻟﺑﺎﻟﻐﯾن ﻓﻲ اﻷردن، ﺑﺎﻹﺿﺎﻓﺔ إﻟﻰ ﺗﻘﯾﯾم ﻣﺳﺗوى اﻟﻣﻌرﻓﺔ واﻟوﻋﻲ ﻟدﯾﮭم ﺑﮭذا اﻟﻣرض.

ﻧود اﻟﺗﺄﻛﯾد ﻋﻠﻰ أن ﺟﻣﯾﻊ اﻟﻣﻌﻠوﻣﺎت اﻟﺗﻲ ﺳﯾﺗم ﺟﻣﻌﮭﺎ ﻋﺑر ھذا اﻻﺳﺗﺑﯾﺎن ﺳﺗﻛون ﻣﺟﮭوﻟﺔ اﻟﮭوﯾﺔ ﺑﺎﻟﻛﺎﻣل، وﺳﺗﺳﺗﺧدم ﻓﻘط ﻷﻏراض اﻟﺑﺣث اﻟﻌﻠﻣﻲ. اﻟﻣﺷﺎرﻛﺔ اﺧﺗﯾﺎرﯾﺔ ﺑﺎﻟﻛﺎﻣل، وﯾﺣﻖ ﻟك اﻻﻧﺳﺣﺎب ﻣن اﻟدراﺳﺔ ﻓﻲ أي وﻗت دون أي اﻟﺗزام. ﺗﺳﺗﻐرق اﻹﺟﺎﺑﺔ ﻋﻠﻰ اﻻﺳﺗﺑﯾﺎن ﻧﺣو ﻋﺷر دﻗﺎﺋﻖ ﺗﻘرﯾﺑﺎً. ﻓﻲ ﺣﺎل وﺟود أﯾﺔ اﺳﺗﻔﺳﺎرات أو اﻟﺣﺎﺟﺔ ﻟﻣزﯾد ﻣن اﻟﻣﻌﻠوﻣﺎت ﺣول اﻟدراﺳﺔ، ﯾﻣﻛن اﻟﺗواﺻل ﻣﻌﻧﺎ ﻋﺑر اﻟﺑرﯾد اﻹﻟﻛﺗروﻧﻲ اﻟﺗﺎﻟﻲ: .mais.saleh@ju.edu.jo

ﻧﺷﻛر ﻣﺳﺎھﻣﺗك اﻟﻘﯾّﻣﺔ واﻟﺗﻲ ﺳﺗﺳﺎﻋد ﻓﻲ ﺗﺣﺳﯾن اﻟﻔﮭم واﻟوﻋﻲ بـ التهاب الجلد التأتبي ﻓﻲ اﻷردن.

**القسم الأول:**

1. الإيميل ----------------------------

2. ﻟﻘد ﻗرأت وﻓﮭﻣت اﻟﻣﻌﻠوﻣﺎت اﻟﻣذﻛورة أﻋﻼه وأﺗﯾﺣت ﻟﻲ اﻟﻔرﺻﺔ ﻟطرح اﻷﺳﺋﻠﺔ وﺗﻠﻘﻲ إﺟﺎﺑﺎت واﺿﺣﺔ، وﻋﻼوة ﻋﻠﻰ ذﻟك، أواﻓﻖ طوﻋًﺎ ﻋﻠﻰ اﻟﻣﺷﺎرﻛﺔ ﻓﻲ ھذا اﻟﺑﺣث؟

- نعم
- لا

**القسم الثاني : ﺧﺻﺎﺋص اﻟﻣﺷﺎرﻛﯾن**

1. اﻟﺟﻧس

- ذكر
- أنثى

2. العمر

- ﻣن 18 إﻟﻰ 20 ﺳﻧﺔ
- ﻣن 21 إﻟﻰ 30 ﺳﻧﺔ
- ﻣن 31 إﻟﻰ 40 ﺳﻧﺔ
- ﻣن 41 إﻟﻰ 50 ﺳﻧﺔ
- ﻣن 51 إﻟﻰ 60 ﺳﻧﺔ
- أﻛﺛر ﻣن 60 ﺳﻧﺔ

3.الجنسية

- أردني(ة)
- غير أردني(ة)

4. مكان الإقامة

- وﺳط اﻷردن )ﻋﻣﺎن، اﻟزرﻗﺎء، اﻟﺑﻠﻘﺎء، ﻣﺎدﺑﺎ(
- ﺷﻣﺎل اﻷردن )إرﺑد، ﻋﺟﻠون، ﺟرش، اﻟﻣﻔرق(
- ﺟﻧوب اﻷردن )اﻟﻛرك، اﻟطﻔﯾﻠﺔ، ﻣﻌﺎن، اﻟﻌﻘﺑﺔ(

5. المستوى التعليمي

- أﻣّﻲ
- ﺗﻌﻠﯾم اﺑﺗداﺋﻲ
- ﺗﻌﻠﯾم إﻋدادي
- ﺗﻌﻠﯾم ﺛﺎﻧوي
- دﺑﻠوم
- درﺟﺔ اﻟﺑﻛﺎﻟورﯾوس
- دراﺳﺎت ﻋﻠﯾﺎ )ﻣﺎﺟﺳﺗﯾر، دﻛﺗوراه(

6. ﻣﺗوﺳط اﻟدﺧل اﻟﺷﮭري ﻟك أو ﻷﺳرﺗك؟

- أﻗل ﻣن 500 دﯾﻧﺎر أردﻧﻲ
- ﻣن 500 إﻟﻰ 1000 دﯾﻧﺎر أردﻧﻲ
- أﻛﺛر ﻣن 1000 دﯾﻧﺎر أردﻧﻲ

7. الحالة الوظيفية

- ﻋﻣل ﻣﺳﺗﻘل
- ﻣﺗﻘﺎﻋد/ة
- ﻣوظف/ة
- طﺎﻟب/ة
- ﻏﯾر ﻣوظف/ة

8. الحالة الاجتماعية:

- غير متزوج/ة
- متزوج/ة
- أرمل/ة
- مطلق/ة

9. هل يوجد تاريخ عائلي للإصابة بالتهاب الجلد التأتبي لدى أحد الوالدين؟

- نعم
- لا

**القسم 3: مدى المعرفة والوعي حول التهاب الجلد التأتبي**

1. هل سمعت من قبل عن مرض جلدي يُعرف بـ التهاب الجلد التأتبي ؟

- نعم
- لا

2. هل تعتقد أن التهاب الجلد التأتبي مرض معدٍ؟

- نعم
- لا
- لا أعلم

3. ما هو دور العلاج في حالة التهاب الجلد التأتبي؟

- السيطرة على المرض
- الشفاء التام من المرض
- لا أعلم تحديدًا

4. ما مدى أهمية الترطيب اليومي المنتظم في علاج التهاب الجلد التأتبي؟

- غير مهم
- مهم إلى حدٍ ما
- مهم جدًا
- لا أعلم تحديدًا

5. هل يمكن أن يرث الطفل الإصابة بالتهاب الجلد التأتبي من أحد والديه المصابين؟

- نعم
- لا
- لا أعلم

6. هل يمكن أن يصاب مريض التهاب الجلد التأتبي بالربو؟

- نعم
- لا
- لا أعلم

7. هل يمكن أن يصاب مريض التهاب الجلد التأتب بالتهاب الأنف التحسسي؟

- نعم
- لا
- لا أعلم

8. هل يمكن أن تؤدي العطوروالصوابين المعطرة إلى تفاقم حالة التهاب الجلد التأتبي؟

- نعم
- لا
- لا أعلم

9. هل يعاني كل طفل مصاب بالتهاب الجلد التأتبي من المرض طوال حياته؟

- نعم
- لا
- لا أعلم
- ليس في كل الحالات

10. هل تتفق أو تختلف مع العبارة التالية:

"بعض الأطعمة دائمًا ما تسبب تفاقم التهاب الجلد التأتبي لدى جميع المرضى"

- نعم، أتفق أن الطعام دائمًا يسبب نوبات
- ليس في كل الحالات
- لا أعلم

11. هل تعتقد أن التهاب الجلد التأتبي قد يؤثرعلى التحصيل الدراسي والأداء الأكاديمي؟

- نعم
- لا
- لا أعلم

12. هل تعتقد أن الطفل المصاب بالتهاب الجلد التأتبي قد يواجه صعوبة في تكوين صداقات؟

- نعم
- لا
- لا أعلم

13. هل تعتقد أن التهاب الجلد التأتبي يمكن أن يؤثر على سلوكيات النظام الغذائي؟

- نعم
- لا
- لا أعلم

14. هل تعتقد أن التهاب الجلد التأتبي يمكن أن يؤثر على جدول التطعيمات لدى الأطفال؟

- نعم
- لا
- لا أعلم

**قسم 4: مدى انتشار التهاب الجلد التأتبي**

1. هل سبق أن تم تشخيصك بالإصابة بالتهاب الجلد التأتبي من قِبل طبيب؟

- نعم
- لا

2. ما تخصص الطبيب الذي قام بالتشخيص؟

- صيدلاني
- طبيب الأسرة
- طبيب أطفال
- طبيب جلدية
- أخصائي حساسية ومناعة
- طبيب عام
- لم أراجع طبيبًا من أجل حالتي الجلدية
- لا أعاني من أي مشكلة جلدية

هل تعاني من أي أعراض جلدية؟

- نعم
- لا

(إذا نعم انتقل إلى قسم 5. إذا لا انتقل إلى قسم 6: إنهاء وإرسال النموذج)

**قسم 5: في حال وجود أعراض جلدية**

1. هل تعاني من أي من الأعراض التالية في الجلد؟ (اختر ما ينطبق)

- حكة
- حمرار
- خروج سوائل أو تقشر وظهور قشور
- جفاف وتشقق في الجلد
- نتوءات صغيرة بارزة

2. ما هو الموقع الأكثر شيوعًا لظهور الطفح الجلدي لديك؟

- الركبة
- الصدر أو الظهر
- الرقبة
- الكاحل
- الكوع
- الوجه

3. كيف تُقيم شدة حالتك الجلدية؟

- الجلد صافٍ (لا توجد علامات للالتهاب الجلدي التأتبي)
- شبه صافٍ (احمرار وتسفنج/نتوءات بالكاد تلاحظ)
- احمرار وتسفنج/نتوءات خفيفة
- احمرار وتسفنج/نتوءات متوسطة
- احمرار وتسفنج/نتوءات شديدة
- احمرار وتسفنج/نتوءات شديدة مع خروج سوائل أو تقشر

4. كم مرة تظهر الأعراض خلال الأسبوع؟

- أكثر من مرة في الأسبوع
- مرة في الشهر
- مرة واحدة في الأسبوع
- نادرًا

5. هل تعتقد أن التهاب الجلد التأتبي يؤثرعلى أنشطتك اليومية أو أدائك في العمل/الدراسة؟

- نعم
- لا

6. هل تعتقد أن التهاب الجلد التأتبي يؤثرعلى علاقاتك الشخصية أو الاجتماعية؟

- نعم
- لا

7. هل تؤثرشدة الحكة على نومك ليلًا؟

- نعم
- لا

8. ما هو الدواء الذي تستخدمه؟

- الكورتيكوستيرويدات الموضعية
- مثبطات المناعة الموضعية
- الكورتيكوستيرويدات المزمنة
- مضادات الهيستامين الفموي
- مثبطات المناعة المزمنة
- مرطب
- دواء آخر (يُذكر أسفل السؤال)
- لا أستخدم أي دواء
- أستخدم دوائين أو أكثر

**قسم 6: إنهاء الاستبيان**

هل ترغب في إرسال إجاباتك؟

- نعم، أوافق على إرسال إجاباتي للمشاركة في هذا البحث

# Supplementary Appendix 2. Knowledge Score

# Scoring System and Correct Answers

The knowledge score was calculated using 14 scored awareness/knowledge items. Each item was coded as a binary variable, with one point assigned for a correct answer and zero points assigned for an incorrect answer or an 'I don't know' response. The total score was calculated by summing the 14 binary items, giving a possible range from 0 to 14, with higher scores indicating greater knowledge of atopic dermatitis (AD). No item weighting was applied.

For descriptive interpretation, scores below 10 out of 14 (<70% of the maximum possible score) were classified as suboptimal knowledge; regression analyses retained the continuous 0-14 score.

This threshold was considered appropriate because the score was based on dichotomous knowledge items, and lower alpha values may be expected with binary response formats and short knowledge scales.

| **No.** | **Knowledge item** | **Correct answer(s)** | **Scoring rule** |
| --- | --- | --- | --- |
| 1 | Have you heard of a skin disease called atopic dermatitis (eczema)? | Yes | Correct = 1; No = 0 |
| 2 | Is atopic dermatitis (eczema) contagious? | No | Correct = 1; Yes/I don't know = 0 |
| 3 | What is the role of therapy in atopic dermatitis (eczema)? | Control the disease | Correct = 1; Cure the disease/I don't know = 0 |
| 4 | What is the importance of constant daily moisturization in the treatment of atopic dermatitis (eczema)? | Somewhat important or very important | Correct = 1; Not important/I don't know = 0 |
| 5 | Can the offspring of a patient with atopic dermatitis (eczema) inherit the disease from their parent? | Yes | Correct = 1; No/I don't know = 0 |
| 6 | Can a person with atopic dermatitis (eczema) develop asthma? | Yes | Correct = 1; No/I don't know = 0 |
| 7 | Can a person with atopic dermatitis (eczema) develop allergic rhinitis? | Yes | Correct = 1; No/I don't know = 0 |
| 8 | Can perfumes and scented soaps worsen atopic dermatitis (eczema)? | Yes | Correct = 1; No/I don't know = 0 |
| 9 | Will every child with eczema suffer all their life from atopic dermatitis (eczema)? | No or not every case | Correct = 1; Yes/I don't know = 0 |
| 10 | Do you agree or disagree that certain foods always make eczema worse in every patient? | Not in every case | Correct = 1; Agree/I don't know = 0 |
| 11 | Do you think atopic dermatitis (eczema) will affect school achievement and performance? | Yes | Correct = 1; No/I don't know = 0 |
| 12 | Do you think a person with atopic dermatitis (eczema) will have problems making friends? | Yes | Correct = 1; No/I don't know = 0 |
| 13 | Do you think atopic dermatitis (eczema) can affect dietary behavior? | Yes | Correct = 1; No/I don't know = 0 |
| 14 | Do you think atopic dermatitis (eczema) can affect children's vaccination schedule? | No | Correct = 1; Yes/I don't know = 0 |
